# Supplementary material
Source: publisher figshare collection journal article supplement (https://rs.figshare.com/ndownloader/files/14198822)
Supplement: Supplementary file [file 14198822]

**Electronic supplementary material (ESM): Photoacclimation and induction of light-enhanced calcification in the mesophotic coral *Euphyllia paradivisa***

Gal Eyal<sup>1,2,\*,#</sup>, Itay Cohen<sup>2,3</sup>, Lee Eyal-Shaham<sup>1,2</sup>, Or Ben-Zvi<sup>1</sup>, Yaron Tikochinski<sup>4</sup>,  
Yossi Loya<sup>1</sup>

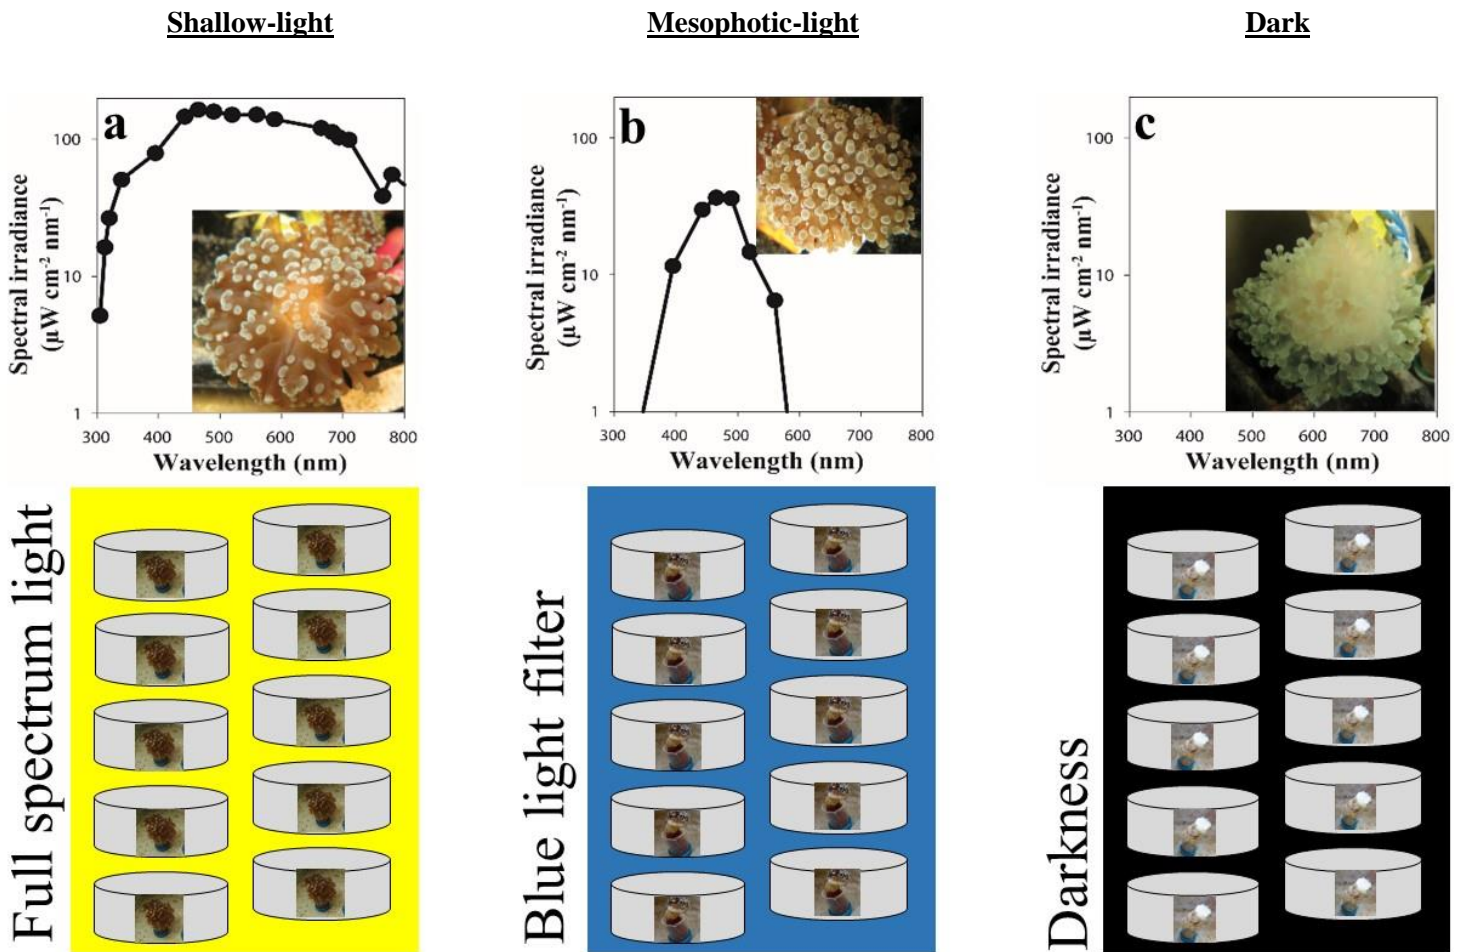

Figure 1s: One-year illustrative experimental set-up of the three different light conditions of the treated *Euphyllia paradivisa*, which simulate; (a) full-spectrum shallow-light, (b) blue mesophotic-light, and (c) deep-sea darkness environments. Each polyp was placed inside a separate two liters glass container with running seawater supply. n = 10 individual polyps in each treatment.

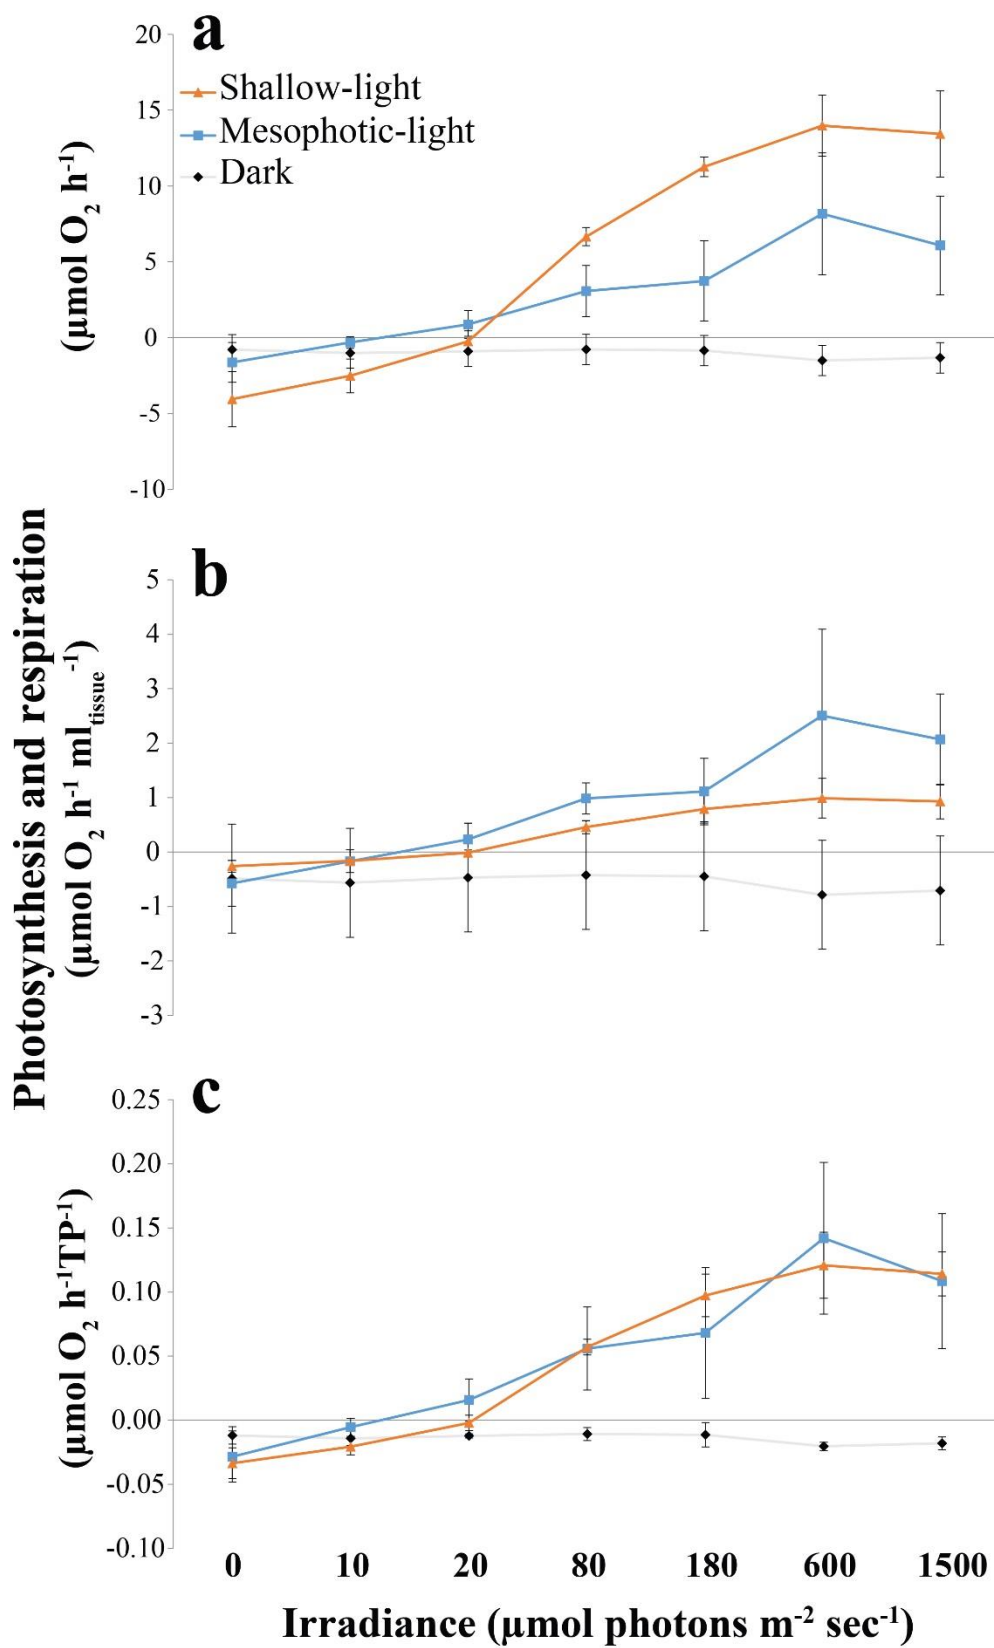

Figure 2s: Photosynthesis vs. irradiance curves (mean $\pm$ SD) of net photosynthesis of the mesophotic coral *E. paradviva* recorded in metabolic chambers after one year of incubation under shallow-light treatment, mesophotic-light treatment, simulating light at ~40 m depth), and total darkness. YSI dissolved O<sub>2</sub> delta measurements of 20 minutes incubation in metabolic chambers under increased light irradiance of 0 to 1500  $\mu\text{mol photons m}^{-2} \text{ s}^{-1}$ . Orange lines represent shallow-light treated corals (triangles), blue lines represent mesophotic-light treated corals (squares), and grey lines represent dark treated corals (black diamonds). n = 4 individual polyps in each treatment (sampled from different colonies).

Table 1s: Species-specific primers for the four main *Symbiodinium* clades in scleractinian corals, A, B, C and D that were designed, tested and used to identify the *Symbiodinium* clade in *E. paradviva*.

| Clade | Primer    | Sequence                      |
|-------|-----------|-------------------------------|
| A     | SITA-405F | 5'-GTGAACCAATGGCCTCTTGA-3'    |
| A     | SITA-510R | 5'-CCTGATAACAAGAGCAGCAGAA-3'  |
| B     | SITB-77F  | 5'-GGAAGGAGAAGTCGTAACAAGG-3'  |
| B     | SITB-178R | 5'-CAAGCGTCCCTCACATCAA-3'     |
| C     | SITC-616F | 5'-GCTTTGCGCGCTGTTATT-3'      |
| C     | SITC-729R | 5'-ACTTGTCTGACTTCATGCTAGAG-3' |
| D     | SITD-18F  | 5'-ACTACGGTGAGGGACTGTT-3'     |
| D     | SITD-109R | 5'-ACAGGCGCGATCGAATATG-3'     |
